# Supplementary material for: Taxane & cyclophosphamide vs anthracycline & taxane-based chemotherapy as adjuvant treatment for breast cancer: a pooled analysis of randomized controlled trials by the Hellenic Academy of Oncology
Source: PubMed Central journal article supplement (PMC6383821; doi:10.18632/oncotarget.26632), 2019-02-05
Supplement: oncotarget-10-1209-s001.pdf [file oncotarget-10-1209-s001.pdf]

# Taxane & cyclophosphamide vs anthracycline & taxane-based chemotherapy as adjuvant treatment for breast cancer: a pooled analysis of randomized controlled trials by the Hellenic Academy of Oncology

## SUPPLEMENTARY MATERIALS

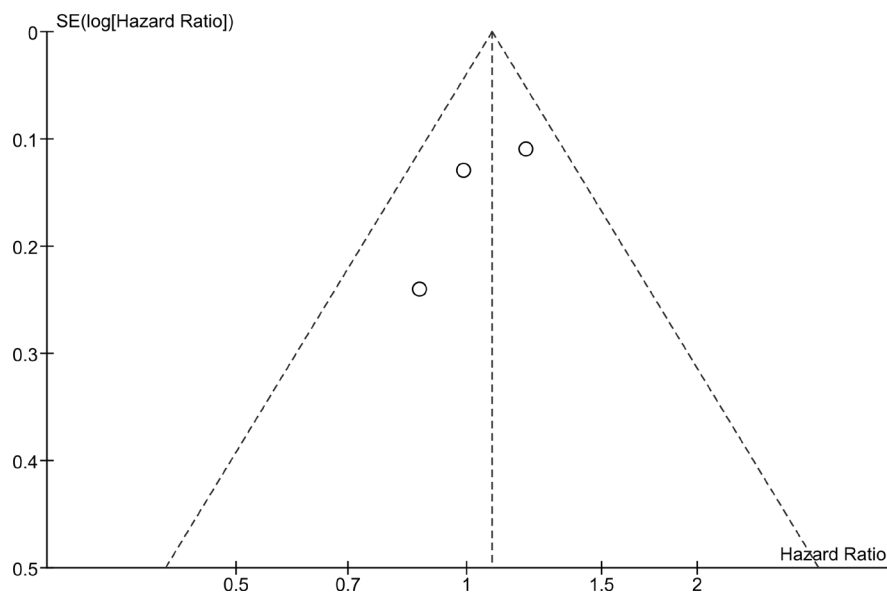

Supplementary Figure 1: Publication bias. SE= standard error.

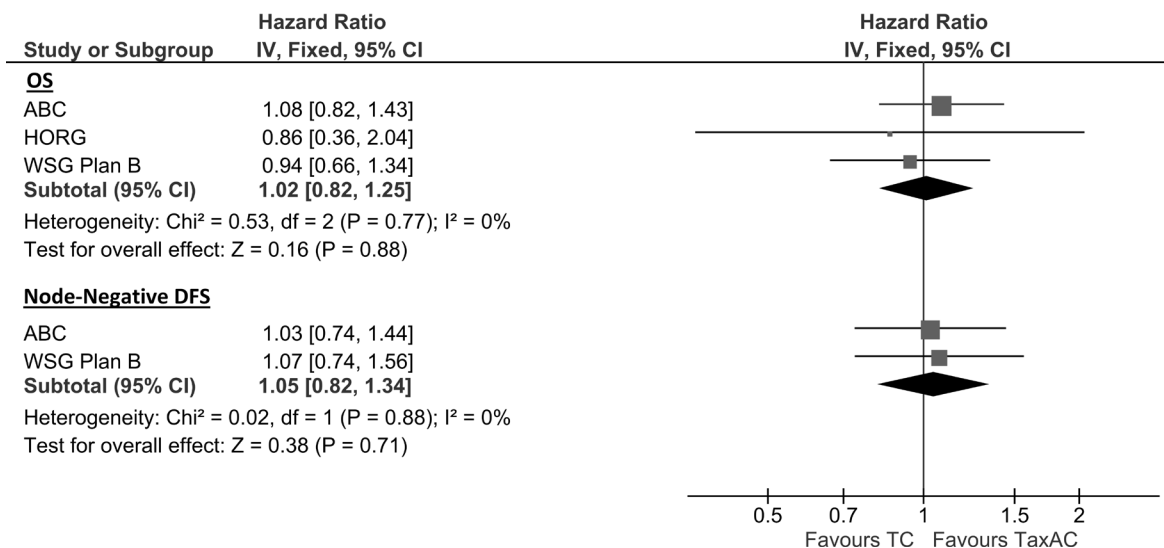

Supplementary Figure 2: Overall survival & node-negative DFS. OS = overall survival, DFS = disease free survival, CI = confidence interval, TC = taxane & cyclophosphamide, TaxAC = taxane & cyclophosphamide & anthracycline.
